# Supplementary material
Source: PubMed Central journal article supplement (PMC6439443)
Supplement: oc8b00917_si_001.pdf [file oc8b00917_si_001.pdf]

## **Molecular basis of broad spectrum N-glycan specificity and processing of therapeutic IgG monoclonal antibodies by Endoglycosidase S2.**

**Erik H. Klontz<sup>1,2,3,#</sup>, Beatriz Trastoy<sup>4,#</sup>, Daniel Deredge<sup>5</sup>, James K. Fields<sup>1,2,3</sup>, Chao Li,<sup>6</sup> Jared Orwenyo<sup>6</sup>, Alberto Marina<sup>4</sup>, Robert Beadenkopf<sup>1</sup>, Sebastian Günther<sup>1,7</sup>, Jair Flores<sup>1</sup>, Patrick L. Wintrode<sup>5</sup>, Lai-Xi Wang<sup>6</sup>, Marcelo E. Guerin<sup>4,8,\*</sup>, Eric J. Sundberg<sup>1,2,9,\*</sup>**

<sup>1</sup>Institute of Human Virology, <sup>2</sup>Department of Microbiology & Immunology, <sup>3</sup>Program in Molecular Microbiology & Immunology, University of Maryland School of Medicine, Baltimore, MD 21201 USA

<sup>4</sup>Structural Biology Unit, CIC bioGUNE, Bizkaia Technology Park, 48160 Derio, Spain

<sup>5</sup>Department of Pharmaceutical Sciences, University of Maryland School of Pharmacy, MD 21201 USA

<sup>6</sup>Department of Chemistry and Biochemistry, University of Maryland, College Park, MD 20742, USA

<sup>7</sup>Photon Science, Deutsches Elektronen-Synchrotron, Hamburg, Germany

<sup>8</sup>IKERBASQUE, Basque Foundation for Science, 48013, Bilbao, Spain.

<sup>9</sup>Department of Medicine, University of Maryland School of Medicine, Baltimore, MD 21201, USA

Running head: *Diverse N-glycan specificity of EndoS2*

\*To whom correspondence should be addressed: Eric J. Sundberg:

[ESundberg@som.umaryland.edu](mailto:ESundberg@som.umaryland.edu) and Marcelo E. Guerin: [mrcguerin@cicbiogune.es](mailto:mrcguerin@cicbiogune.es)

#These authors contributed equally to this work

## Supplementary Tables

**Table S1. Data collection and refinement statistics.** Overall values are reported with highest resolution shell in parentheses.

| Data Collection                                     | EndoS2 unliganded                             | EndoS2-CT                                     | EndoS2-HM                                     |
|-----------------------------------------------------|-----------------------------------------------|-----------------------------------------------|-----------------------------------------------|
| Resolution range                                    | 38.89 - 2.75 (2.85 -2.75)                     | 39.71 - 2.5 (2.59 - 2.5)                      | 29.46 - 2.5 (2.59 - 2.5)                      |
| Space group                                         | P2 <sub>1</sub> 2 <sub>1</sub> 2 <sub>1</sub> | P2 <sub>1</sub> 2 <sub>1</sub> 2 <sub>1</sub> | P2 <sub>1</sub> 2 <sub>1</sub> 2 <sub>1</sub> |
| Unit cell (a, b, c, $\alpha$ , $\beta$ , $\gamma$ ) | 89.17, 105.83, 259.28, 90, 90, 90             | 89.38, 105.51, 259.77, 90, 90, 90             | 88.97, 105.353, 257.30, 90, 90, 90            |
| Total reflections                                   | 389940 (37833)                                | 312202 (31674)                                | 507462 (51943)                                |
| Unique reflections                                  | 64288 (6088)                                  | 75959 (7820)                                  | 84391 (8314)                                  |
| Multiplicity                                        | 3.2 (3.0)                                     | 4.1 (4.1)                                     | 6.0 (6.2)                                     |
| Completeness (%)                                    | 93.9 (95.7)                                   | 88.0 (93.0)                                   | 100 (100)                                     |
| Mean I/sigma(I)                                     | 6.1 (1.6)                                     | 8.41 (1.21)                                   | 10.01 (1.37)                                  |
| Wilson B-factor                                     | 40.89                                         | 43.96                                         | 45.53                                         |
| R <sub>merge</sub>                                  | 0.149 (0.712)                                 | 0.140 (1.21)                                  | 0.143 (1.21)                                  |
| R <sub>meas</sub>                                   | 0.197 (0.942)                                 | 0.159 (1.37)                                  | 0.157 (1.32)                                  |
| CC1/2                                               | 0.975 (0.363)                                 | 0.993 (0.488)                                 | 0.995 (0.519)                                 |
| CC*                                                 | 0.994 (0.694)                                 | 0.998 (0.81)                                  | 0.999 (0.827)                                 |
| <b>Refinement</b>                                   |                                               |                                               |                                               |
| Reflections used in refinement                      | 60280 (6056)                                  | 75877 (7800)                                  | 84382 (8314)                                  |
| Reflections used for R-free                         | 3042 (300)                                    | 3796 (364)                                    | 4298 (426)                                    |
| R <sub>work</sub>                                   | 0.210 (0.309)                                 | 0.193 (0.295)                                 | 0.198 (0.281)                                 |
| R <sub>free</sub>                                   | 0.264 (0.373)                                 | 0.242 (0.348)                                 | 0.248 (0.333)                                 |
| CC(work)                                            | 0.941 (0.618)                                 | 0.966 (0.728)                                 | 0.956 (0.733)                                 |
| CC(free)                                            | 0.896 (0.565)                                 | 0.942 (0.702)                                 | 0.926 (0.666)                                 |
| Number of non-hydrogen atoms                        | 12631                                         | 13077                                         | 13060                                         |
| Macromolecules                                      | 12349                                         | 12459                                         | 12514                                         |
| Ligands                                             | 2                                             | 198                                           | 175                                           |
| Protein residues                                    | 1573                                          | 1574                                          | 1574                                          |
| Waters                                              | 283                                           | 420                                           | 372                                           |
| RMS(bonds)                                          | 0.009                                         | 0.009                                         | 0.009                                         |
| RMS(angles)                                         | 1.11                                          | 1.21                                          | 1.16                                          |
| Ramachandran favored (%)                            | 96                                            | 96                                            | 96                                            |
| Ramachandran allowed (%)                            | 3.1                                           | 3.8                                           | 3.5                                           |
| Ramachandran outliers (%)                           | 0.9                                           | 0.2                                           | 0.5                                           |
| Rotamer outliers (%)                                | 1.4                                           | 1.2                                           | 1.2                                           |
| Average B-factor for macromolecules                 | 38.22                                         | 48.70                                         | 52.65                                         |
| Average B-factor for carbohydrates                  | N/A                                           | 66.34                                         | 69.01                                         |
| PDB Code                                            | 6E58                                          | 6MDS                                          | 6MDV                                          |

**Table S2. Structural homology of EndoS2 with GH18 family of endoglycosidases**

| Enzyme             | Source                                       | Glycan structure hydrolyzed                                                         | Protein substrate                                 | Z-score | RMSD (Å) | PDB CODE |
|--------------------|----------------------------------------------|-------------------------------------------------------------------------------------|---------------------------------------------------|---------|----------|----------|
| EndoS2             | <i>Streptococcus pyogenes</i> (serotype M49) | 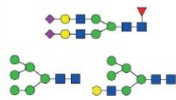   | IgG(1-4) Fc<br>AGP<br>(alpha-1-acid glycoprotein) | -       | -        | -        |
| EndoS              | <i>Streptococcus pyogenes</i> (serotype M1)  |    | IgG1 Fc                                           | 44.9    | 1.9      | 6EN3     |
| EndoF <sub>3</sub> | <i>Elizabethkingia meningoseptica</i>        |    | No specific substrate known                       | 21.6    | 2.5      | 1EOM     |
| EndoT              | <i>Hypocrea jecorina</i>                     |    | No specific substrate known                       | 19.0    | 3.1      | 4AC1     |
| EndoH              | <i>Streptomyces plicatus (griseus)</i>       |    | No specific substrate known                       | 16.7    | 3.2      | 1C3F     |
| EndoF <sub>1</sub> | <i>Elizabethkingia meningoseptica</i>        |   | No specific substrate known                       | 14.4    | 3.3      | 2EBN     |
| EndoBT             | <i>Bacteroides thetaiotaomicron</i>          |  | No specific substrate known                       | 12.9    | 3.4      | 3POH     |

▲ Fuc ■ GlcNAc ● Man ● Gal ◆ Neu5Ac

**Table S3. Summary of constructs**

| Description                                    | Sequence                                                                                                                                            | Template                                                                                              | Primers (5' to 3')                                                                                                                                                                                                                                                                                     | Method                                     |
|------------------------------------------------|-----------------------------------------------------------------------------------------------------------------------------------------------------|-------------------------------------------------------------------------------------------------------|--------------------------------------------------------------------------------------------------------------------------------------------------------------------------------------------------------------------------------------------------------------------------------------------------------|--------------------------------------------|
| EndoS <sub>WT</sub>                            | -                                                                                                                                                   | pGEXndoS<br>(GenBank entry:<br>AF296340)                                                              | 1)GGAATTCATATGGAGGAGAAGACTGTTCAG<br>GTTTCAGAAAGGATTACCTTCTATCGATA<br>2)CGCGGATCCCAGTTTTTTTAGCAGTCGCTTT<br>TCTCAATACAATCTTTCAAACTCCA                                                                                                                                                                    | Restriction/ligation<br>(NdeI, BamHI)      |
| EndoS <sub>2WT</sub>                           | -                                                                                                                                                   | pGEXndoS2<br>(GenBank entry:<br>ACI61688.1)                                                           | 1)GGAATTCATATGGGAAAGACAGATCAGCAG<br>GTTGGTGCTAAATTGGTACAGGAAATCC<br>2)CGCGGATCCCAGATCCTTCAGCGTATTAGCG<br>ACATCATTTGATAAACGTTGTCCGAGG                                                                                                                                                                   | Restriction/ligation<br>(NdeI, BamHI)      |
| EndoS <sub>2R72A/Q8<br/>7A/H88A</sub>          | -                                                                                                                                                   | EndoS <sub>2WT</sub>                                                                                  | 1)GCTTCAACAGGAATAGATGGTAAACAGGCTG<br>CTCCAGAAAATACTATGGCTGAGGTCCCAAAA<br>GAAG<br>2)CTATTCTGTTGAAGCAGCATCATGCCATGTA<br>GCAAAATAACCAGCATATAGTGGTCCGCGTTTT<br>CCTTC                                                                                                                                       | PCR-based site-<br>directed<br>mutagenesis |
| EndoS <sub>2D108A</sub>                        | -                                                                                                                                                   | EndoS <sub>2WT</sub>                                                                                  | 1)GTTGATATCTTATTTGTTTTTCATGCGCATACA<br>GCTTCAGATAGTCCATTTTG<br>2)CAAAATGGACTATCTGAAGCTGTATGCGCAT<br>GAAAAACAAATAAGATATCAAC                                                                                                                                                                             | PCR-based site-<br>directed<br>mutagenesis |
| EndoS <sub>2H109A</sub>                        | -                                                                                                                                                   | EndoS <sub>2WT</sub>                                                                                  | 1)GATATCTTATTTGTTTTTCATGACGCTACAGC<br>TTCAGATAGTCCATTTTG<br>2)CCAAATGGACTATCTGAAGCTGTAGCGTCA<br>TGAAAAACAAATAAGATATC                                                                                                                                                                                   | PCR-based site-<br>directed<br>mutagenesis |
| EndoS <sub>2N142A/E<br/>143A/T148A</sub>       | -                                                                                                                                                   | EndoS <sub>2WT</sub>                                                                                  | 1)TGCTTTAAATGGACGTGCTGGTTTATCTAAAG<br>ATTATCCTGATACTCCTGAGGGGAAC<br>2)ACGTCCATTTAAAGCAGCAACACCAATTGTCT<br>GAACAAGTGCCGTTCCCTGTTG                                                                                                                                                                       | PCR-based site-<br>directed<br>mutagenesis |
| EndoS <sub>2E188A</sub>                        | -                                                                                                                                                   | EndoS <sub>2WT</sub>                                                                                  | 1)GGACTAGATATTGATATTGAGCACGCATTTAC<br>GAACAAAAGAACACCTG<br>2)CAGGTGTTCTTTTGTTCGTAATGCGTGCTCA<br>ATATCAATATCTAGTCC                                                                                                                                                                                      | PCR-based site-<br>directed<br>mutagenesis |
| EndoS <sub>2T190A/N1<br/>91A/R193A</sub>       | -                                                                                                                                                   | EndoS <sub>2WT</sub>                                                                                  | 1)TTGCTGCTAAAGCTACACCTGAAGAAGATGC<br>TCGTGCTCTAAATGTTTTTAAAG<br>2)GTAGCTTTAGCAGCAAATTCGTGCTCAATATC<br>AATATCTAGTCCATCGACACC                                                                                                                                                                            | PCR-based site-<br>directed<br>mutagenesis |
| EndoS <sub>2Q250A/Y<br/>252A</sub>             | -                                                                                                                                                   | EndoS <sub>2WT</sub>                                                                                  | 1)TTCTTAGAGCTTATGCTGGTTCACAAGGTGG<br>AGAAGCTGAAGTGGATACTATAAAC<br>2)GCATAAGCTCTAAGAAGATAATCAAGATCTTC<br>CGCTATCCCTTTAAATATTGG                                                                                                                                                                          | PCR-based site-<br>directed<br>mutagenesis |
| EndoS <sub>2S285A/E2<br/>88A/E289A/N295A</sub> | -                                                                                                                                                   | EndoS <sub>2WT</sub>                                                                                  | 1)CTGCTTCTGCGTCCAAAGGGCTTTATGGTT<br>TGATGTTAACGAATACGACCCTAACATCCTG<br>2)TTGGACGCAGAAGCAGCAAAAAACGCGAATC<br>CAATCATGAAGTGGCTAGCATCAATATAATTCT<br>G                                                                                                                                                     | PCR-based site-<br>directed<br>mutagenesis |
| EndoS <sub>2EndoS<br/>loop 3/4 swap</sub>      | EndoS <sub>243-97</sub> —<br>EndoS <sub>184-199</sub> —<br>EndoS <sub>2109-</sub><br>145—EndoS <sub>236-</sub><br>252—<br>EndoS <sub>2158-787</sub> | <b>Reaction 1:</b><br>EndoS <sub>2WT</sub><br><br><b>Reaction 2:</b><br>EndoS <sub>2loop 3 swap</sub> | <b>Reaction 1:</b><br>1)TTGACAAAAAGAAGATACAGCAGGCGTAGA<br>ACGTGCTCTAAATGTTTTTAAAGAGATTGCGCA<br>GTTAATAGG<br>2)TCTTCTTTTTGTCAACTTTTGAATACTATCG<br>TGCTCAATATCAATATCTAGTCCATCGACACCA<br>CGATCAG<br><b>Reaction 2:</b><br>1)TGGGGGTGATAACAGTGGTATTGCAGAAGAT<br>TCTAAAGATTATCCTGATACTCCTGAGGGGAAC<br>AAAGC | FastCloning <sup>1</sup>                   |

|                                    |                                                                                                             |                                                                                                   |                                                                                                                                                                                                                                                                                              |                                            |
|------------------------------------|-------------------------------------------------------------------------------------------------------------|---------------------------------------------------------------------------------------------------|----------------------------------------------------------------------------------------------------------------------------------------------------------------------------------------------------------------------------------------------------------------------------------------------|--------------------------------------------|
|                                    |                                                                                                             |                                                                                                   | 2)ACTGTTATCACCCCCAGCTAGGAAACGCCAT<br>GGAATTGTCTGAACAAGTGCCGTTCCCTGTTGA<br>TG                                                                                                                                                                                                                 |                                            |
| EndoS with<br>EndoS2 CBM           | EndoS <sub>37-767</sub> —<br>EndoS <sub>2639-787</sub> —EndoS <sub>921-995</sub>                            | <u>Reaction 1a:</u><br>EndoS <sub>WT</sub><br><br><u>Reaction 1b:</u><br>EndoS <sub>WT</sub>      | <u>Reaction 1a:</u><br>1)AATATACCGAACTCCAAATTTAGGTTATCCG<br>TTACCTAACGCCGACACTATC<br>2)GCCCCTTTTGCCAAATTAACCATCATGGTTTT<br>TTCGTACCAACAATCACTTTAG<br><u>Reaction 1b:</u><br>1)ATTTGGCAAAGGGGCTAAAGTGATTGGTAC<br>ATCTGGGGACTTTGAGC<br>2)TGGAGTTCGGTATATTGAGGGTAATAAGAGC<br>TAGCTCCACCATCTACAC | FastCloning <sup>1</sup>                   |
| EndoS with<br>EndoS2 GH            | EndoS <sub>242-386</sub> —EndoS <sub>446-995</sub>                                                          | <u>Reaction 1a:</u><br>EndoS <sub>WT</sub><br><br><u>Reaction 1b:</u><br>EndoS <sub>WT</sub>      | <u>Reaction 1a:</u><br>1)ATATACATATGGGAAAGACAGATCAGCAGGT<br>TGGTGCTAAATTGG<br>2)TCAATCAGATCATAGCGTTTGTCTTCGGTCAT<br>CAATGTTTTTAATTTTCG<br><u>Reaction 1b:</u><br>1)GCTATGATCTGATTGATGAGAAAGATTCCCA<br>GATAAGGCTTTGC<br>2)TTTCCCATATGTATATCTCCTTCTTAAAGTTAA<br>ACAAAATTATTTCTAGAGGGGAATTG     | FastCloning <sup>1</sup>                   |
| EndoS with<br>EndoS2 CBM<br>and GH | EndoS <sub>242-386</sub> —EndoS <sub>446-764</sub> —<br>EndoS <sub>2639-787</sub> —EndoS <sub>921-995</sub> | <u>Reaction 1a:</u><br>EndoS <sub>WT</sub><br><br><u>Reaction 1b:</u><br>EndoS with<br>EndoS2 CBM | <u>Reaction 1a:</u><br>1)ATATACATATGGGAAAGACAGATCAGCAGGT<br>TGGTGCTAAATTGG<br>2)TCAATCAGATCATAGCGTTTGTCTTCGGTCAT<br>CAATGTTTTTAATTTTCG<br><u>Reaction 1b:</u><br>1)GCTATGATCTGATTGATGAGAAAGATTCCCA<br>GATAAGGCTTTGC<br>2)TTTCCCATATGTATATCTCCTTCTTAAAGTTAA<br>ACAAAATTATTTCTAGAGGGGAATTG     | FastCloning <sup>1</sup>                   |
| EndoS <sub>2W712A</sub>            | -                                                                                                           | EndoS <sub>WT</sub>                                                                               | 1)TCCAGTTAGTTTGTCCCGCAGTGAAGAATCTA<br>TCTGACTTTTCAC<br>2)GTGAAAAGTCAGATAGATTCTTCACTGCGGG<br>ACAAACTAACTGGA                                                                                                                                                                                   | PCR-based site-<br>directed<br>mutagenesis |
| EndoS <sub>2F710S</sub>            | -                                                                                                           | EndoS <sub>WT</sub>                                                                               | 1)CAGTTAGTTTGTCCCAAGTGCTGAATCTATC<br>TGACTTTTCACC<br>2)GGTGAAAAGTCAGATAGATTCACTTGGG<br>GACAACTAACTG                                                                                                                                                                                          | PCR-based site-<br>directed<br>mutagenesis |
| EndoS <sub>2Y820S</sub>            | -                                                                                                           | EndoS <sub>WT</sub>                                                                               | 1)CGGTATATTGAGGGCTATAAGAGCTAGCTCC<br>ACCATCTAC<br>2)GTAGATGGTGGAGCTAGCTCTTATAGCCCTC<br>AATATACCG                                                                                                                                                                                             | PCR-based site-<br>directed<br>mutagenesis |
| EndoS <sub>2F710S/Y820S</sub>      | -                                                                                                           | EndoS <sub>2F710S</sub>                                                                           | 1)CGGTATATTGAGGGCTATAAGAGCTAGCTCC<br>ACCATCTAC<br>2)GTAGATGGTGGAGCTAGCTCTTATAGCCCTC<br>AATATACCG                                                                                                                                                                                             | PCR-based site-<br>directed<br>mutagenesis |
| EndoS <sub>2E186L</sub>            | -                                                                                                           | EndoS <sub>WT</sub>                                                                               | 1)CTTTTGTTCGTAATTCGTGCGCAATATCAAT<br>ATCTAGTCCATCGAC<br>2)GTCCGATGGACTAGATATTGATATTGCGCACG<br>AATTTACGAACAAAAG                                                                                                                                                                               | PCR-based site-<br>directed<br>mutagenesis |

## Supplementary Figures

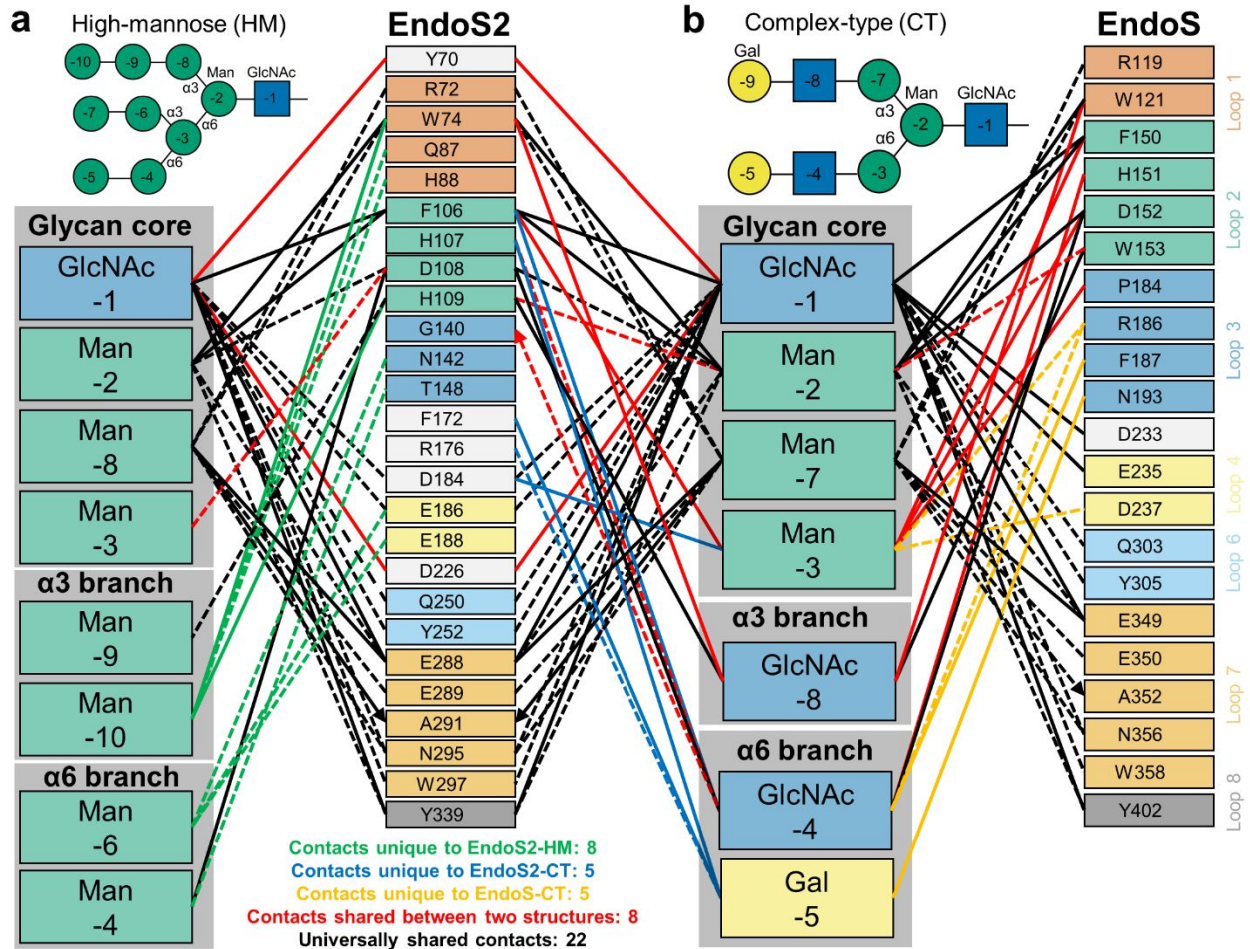

**Figure S1. Diagram of contacts between EndoS, EndoS2, and substrates. A.** All contacts made between EndoS2 and high-mannose glycan; **B.** All contacts made between EndoS2, EndoS and complex-type glycan. Solid lines represent van der Waals and hydrophobic interactions, while dashed lines represent hydrogen bonds and ionic interactions. Arrows represent contacts made with the enzyme backbone. Black lines are universally conserved contacts; red lines are shared between two structures; yellow lines are unique to EndoS-CT; blue lines are unique to EndoS2-CT; green lines are unique to EndoS2-HM. Enzyme residues are colored according to the loop they reside in.

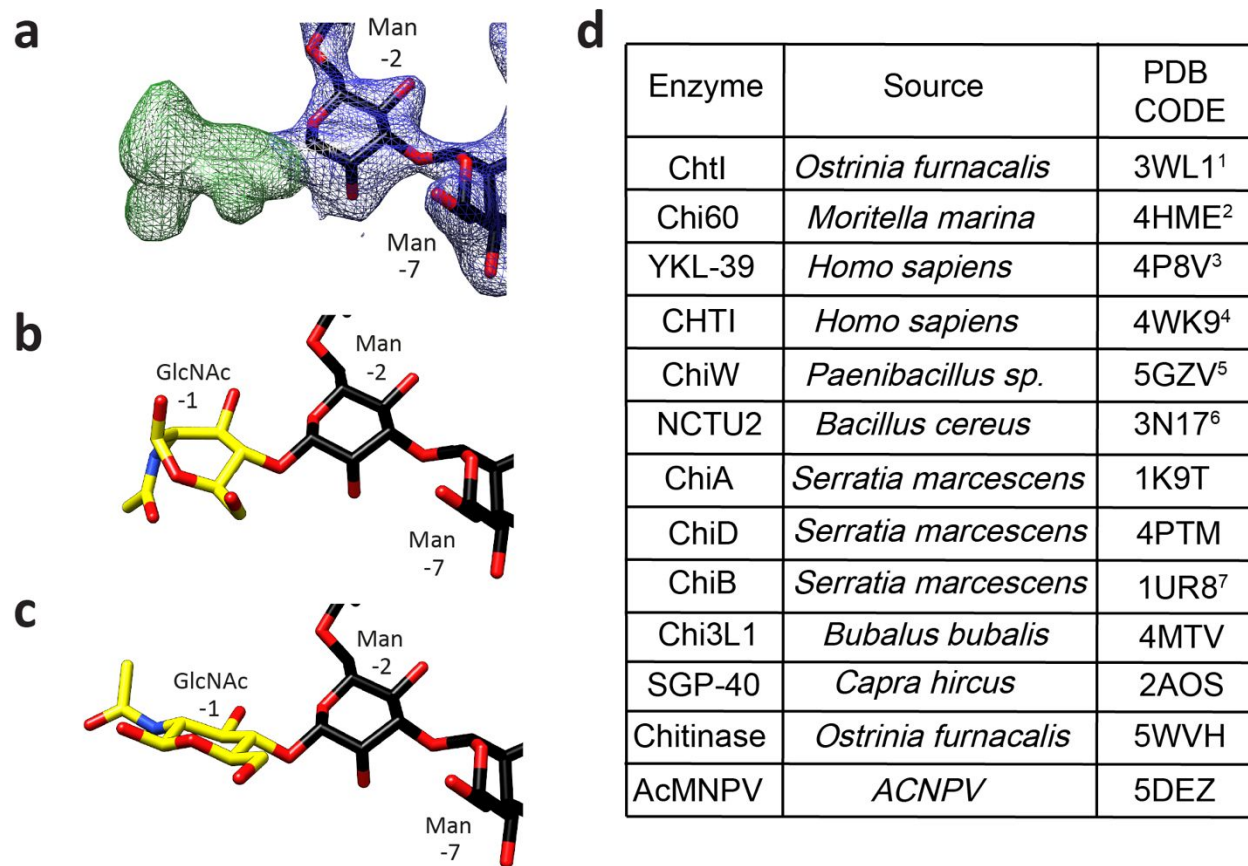

**Figure S2. Conformation of the GlcNAc (-1) in the EndoS2-HM complex structure.** (a) Final electron density maps ( $2mF_o-DF_c$  contoured at  $1\sigma$  [blue] and  $mF_o-DF_c$  at  $3\sigma$  [green]) corresponding to the HM glycan. (b) Boat conformation of the GlcNAc -1 found in the crystal structure of EndoS2-HM complex (c) Chair conformation of the GlcNAc (d) Representative enzymes of the family GH18<sup>2-8</sup> that present a “skew-boat” conformation in the enzyme-product X-ray crystal structures. A substrate-assisted mechanism with retention of the anomeric configuration has been described for the enzymes of the GH18 family<sup>9-13</sup>. First, the protonation of the anomeric oxygen by an acidic residue (E186 in EndoS2) facilitates the nucleophilic attack of the carbonyl group of the 2-acetamide group of the GlcNAc (-1) to the anomeric carbon forming an oxazoline intermediate. Secondly, a water molecule, deprotonated by the same residue that acts as an acid in the previous step, hydrolyses the oxazoline intermediate. During the catalytic cycle diverse conformational changes of the GlcNAc (-1) has been described<sup>14</sup>. The observed “skew-boat” conformation of GlcNAc (-1) observed in the EndoS2-HM structure corresponds to the step after the nucleophilic attack of the water molecule and before releasing the glycan product.

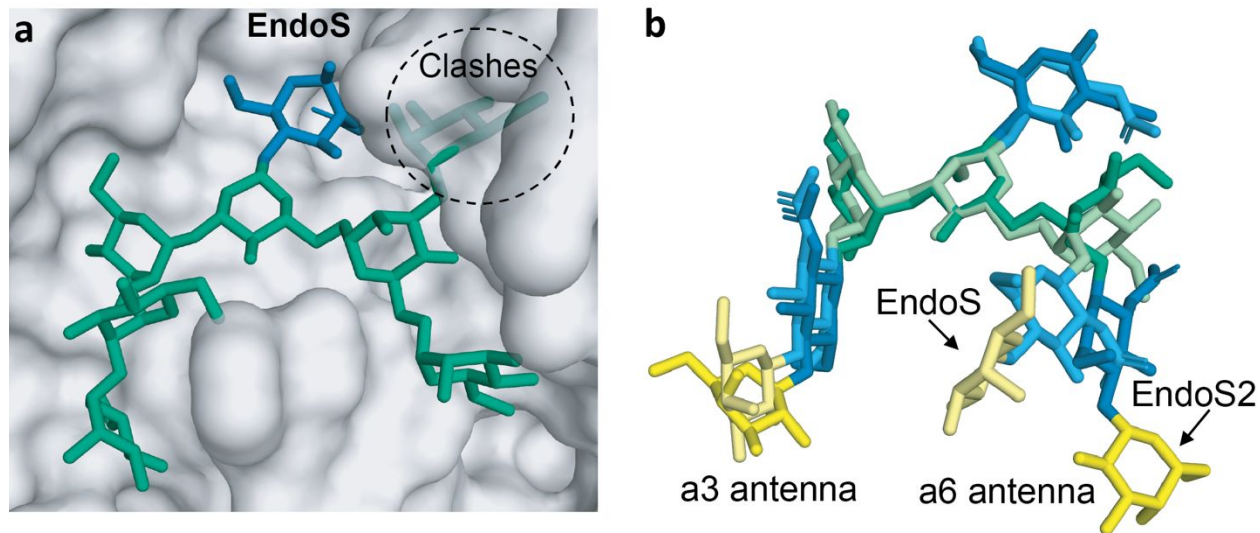

**Figure S3. Structural comparison of EndoS2 and EndoS active sites. (a)** Overlay of the high-mannose glycan from EndoS2 modelled into the EndoS active site (PDB 6EN3), highlighting clashes formed between the  $\alpha 6$  antenna and loops 3 and 4 of EndoS. **(b)** Overlay of the complex-type glycans bound in the EndoS versus EndoS2 co-crystal structures, highlighting extreme similarity in the core and  $\alpha 3$  antenna, with slight differences in  $\alpha 6$  antenna.



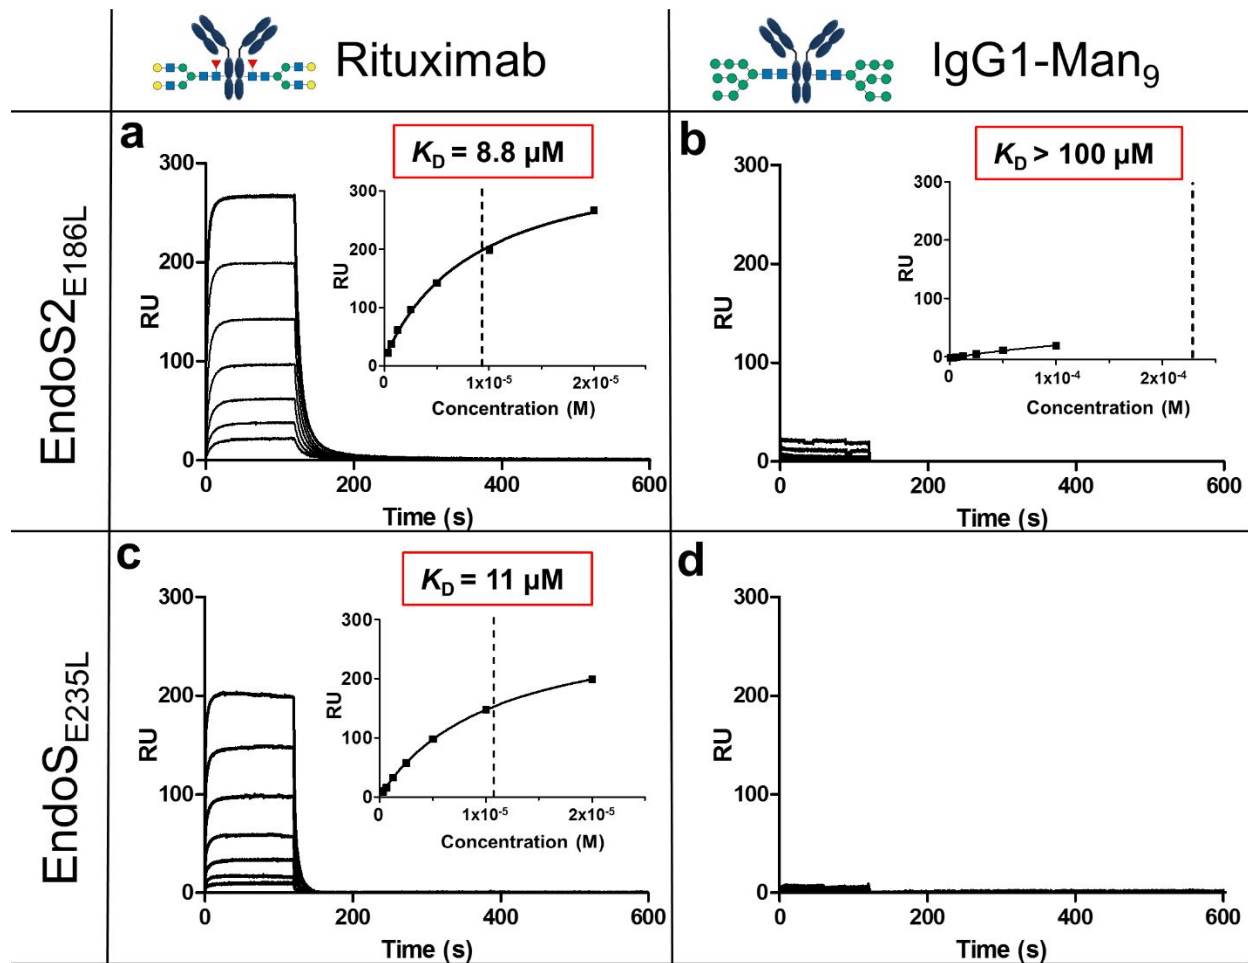

**Figure S4.** Surface plasmon resonance of catalytically dead EndoS and EndoS2 with complex-type and high-mannose substrates. (a) EndoS2 with Rituximab (IgG1-CT) and (b) IgG1-Man<sub>9</sub>, (c) EndoS with Rituximab and (d) IgG1-Man<sub>9</sub>.

```

EndoS      -----KIPEKIPMKPLHGPLYGGYFRRTWHDKTSDPDPT---EKDKVNSMGELPKEVD      145
EndoS2     MGKTDQQVGAKLVQE-IREGKRGPLYAGYFRRTWHDRASTGIDGKQQHPENTMAEVPKEVD      101
          * : :: : : *****.*****::*          ::. *:*.*:*****

EndoS      LAFIFHDWTKDYSIFWKELATKHVPKLNKQGTRVIRTIPWRFLAGGDNSGIAEDTSKYPN      205
EndoS2     LLFVFHDHTASDSEFWSELKDSYVHKLHQQTALVQTIGVNELNGR-----TGLSKDYPD      156
          : *:* ** * . * * **.* ** .:* **::** *::** . * * : :..**

EndoS      TEGNKALAKAIVDEYVYKYNLDGLDVDVEHDSIPKVDKKEDTAGVERSIQVFEEIGKLI      265
EndoS2     TEGNKALAAAIVKAFVTDRGVDGLDIDEHEFTNKRTPEE----DARALNVFKEIAQLI      212
          ***** ** .:* . .:*****:***: * :* *:::**.*:***

EndoS      GPKGVDKSRLFIMDSTYMADKNPIIERGAPYINLLLVQVYGSQGEKGGWEPVSNRPEKTM      325
EndoS2     GKNGSDKSKLLIMDTLSVENNPIFKGIAEDLDYLLRQYGSQGEAEV-----DTI      264
          * : * **::**:* * .::**::: * :: ** * ***** :. .*:

EndoS      EERWQGYSKYIRPEQYMIGFSFYEENAQEGNLWDINSRKDEDKANGINTDITGTRAERY      385
EndoS2     NSDWNQYQNYIDASQFMIGFSFFESASKGNLWFDVNEYDPNNPEK--GKDIEGTRAKY      322
          :. * : *::** .*:*****.*.*:***:*:* . : : .** *****:*

EndoS      ARWQPKTGGVKGIFSYAIDRDGVAHQPKYAKQKE--FKDATDNIFHSDYSVSKALKT      442
EndoS2     AEWQPSTGGLKAGIFSYAIDRDGVAHVPSTYKNRTSTNLQRHEVDNISHTDYTVSRKLKT      382
          * .**.***:* .***** ***** *..* :.. :. .** *:*:*:*: **

EndoS      VML- 445
EndoS2     LMTE 386

```

**Figure S5. Sequence alignment of EndoS and EndoS2 GH domains.** GH domain loops are colored as followed: loop 1, red; loop 2, green; loop 3, blue; loop 4, yellow; loop 5, pink; loop 6, cyan; loop 7, olive; loop 8/9, black. Alignment made using Clustal Omega.

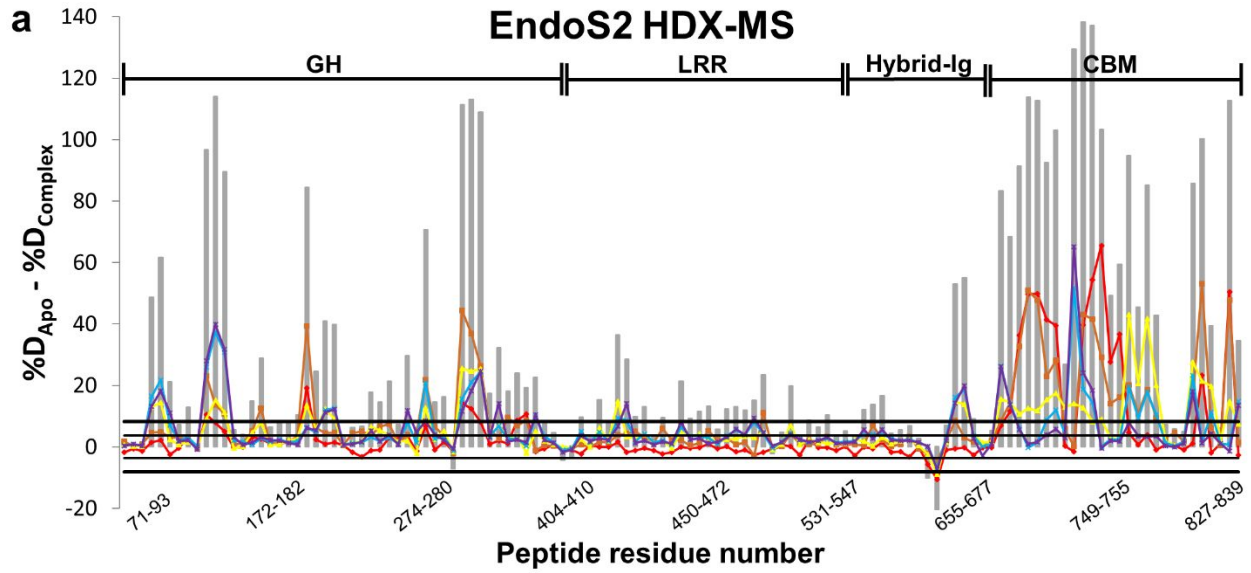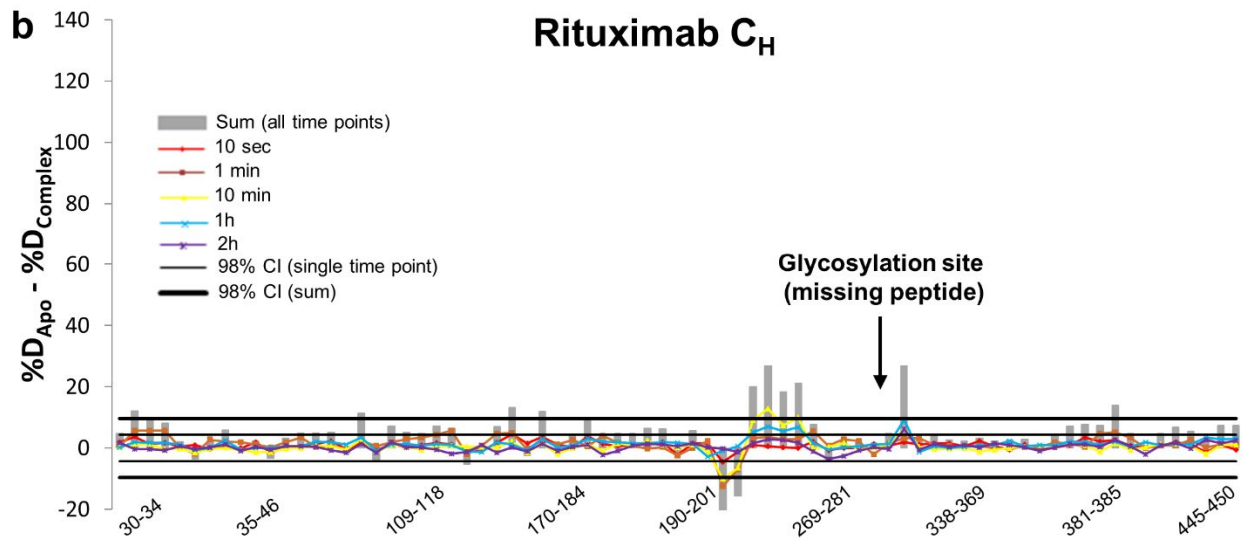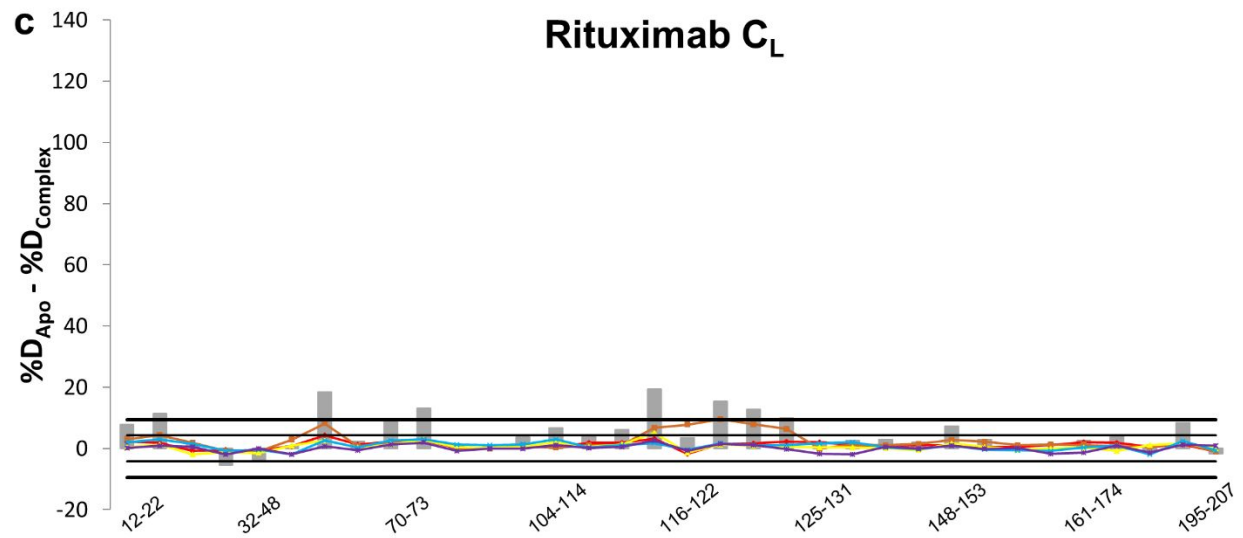

**Figure S6. Hydrogen-deuterium exchange mass spectrometry.** (a) Differences in percent deuteration between peptides from EndoS2<sub>E186L</sub> in the unliganded and IgG1-complexed state. Glycoside hydrolase (GH), leucine-rich repeat (LRR), hybrid-Ig, and carbohydrate-binding module (CBM) domains are annotated. (b) Differences in deuteration between peptides from IgG1 heavy chain and (c) light chain in the unliganded and EndoS2<sub>E186L</sub>-complexed state. Data could not be obtained for the annotated glycosylation site. (a-c) Individual peptides are plotted on the x-axis from N- to C-terminus based on the sequence number of the first residue in the peptide. For each peptide, differences in percent deuteration at individual time points are color coded according to the legend, with the sum of the differences over all time points plotted as grey bars. 98% confidence intervals for individual time points and sums are plotted as thin and thick black lines, respectively.

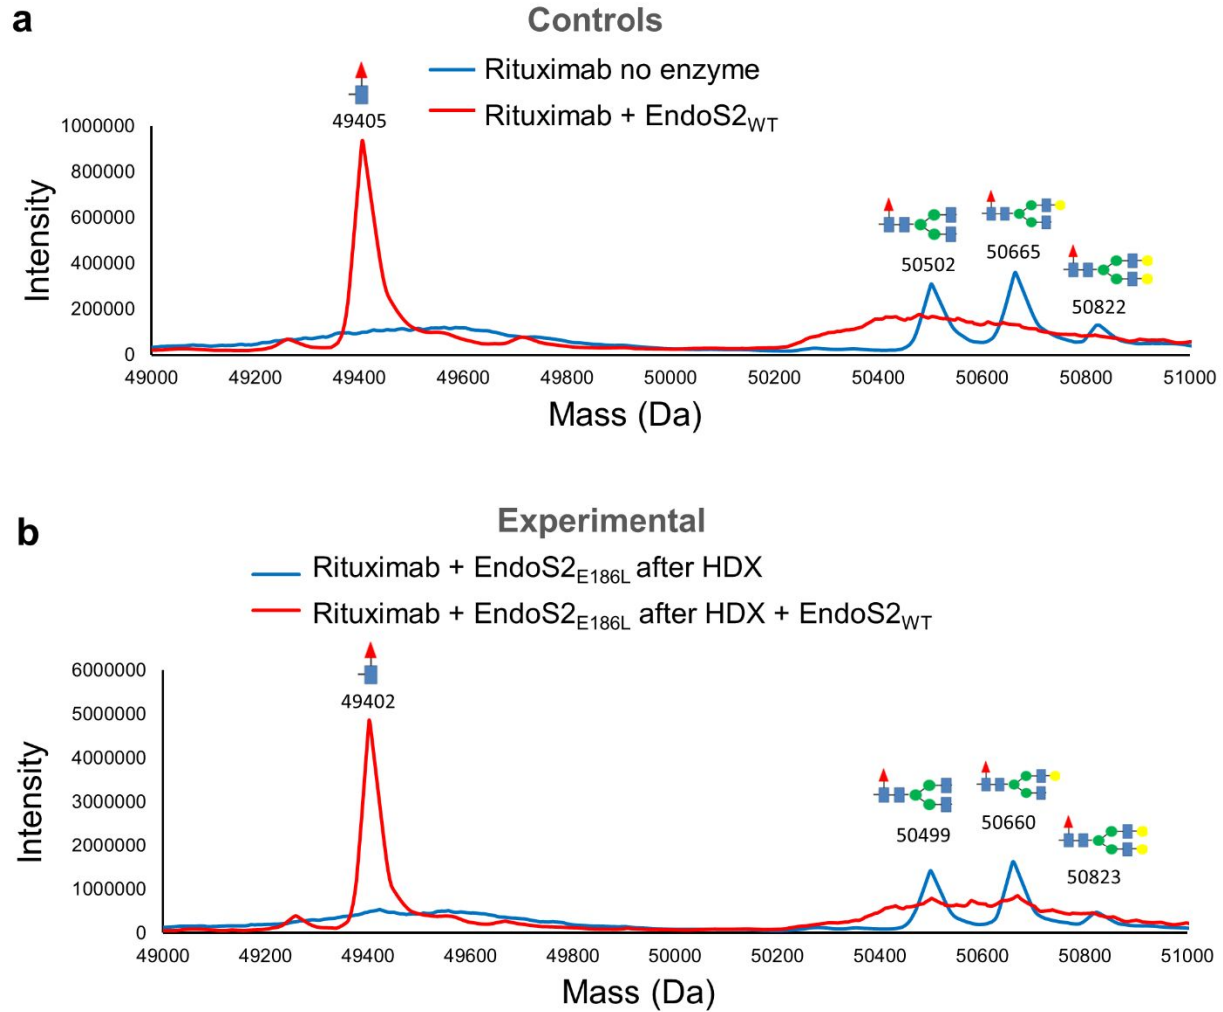

**Figure S7. Mass spectrometry of Rituximab glycosylation.** (a) Rituximab before (blue) and after (red) treatment with EndoS2<sub>WT</sub>. (b) Samples that were subjected to hydrogen-deuterium exchange with catalytically inactive EndoS2<sub>E186L</sub> were analyzed for deglycosylation (blue). The same samples after addition of EndoS2<sub>WT</sub> (red).

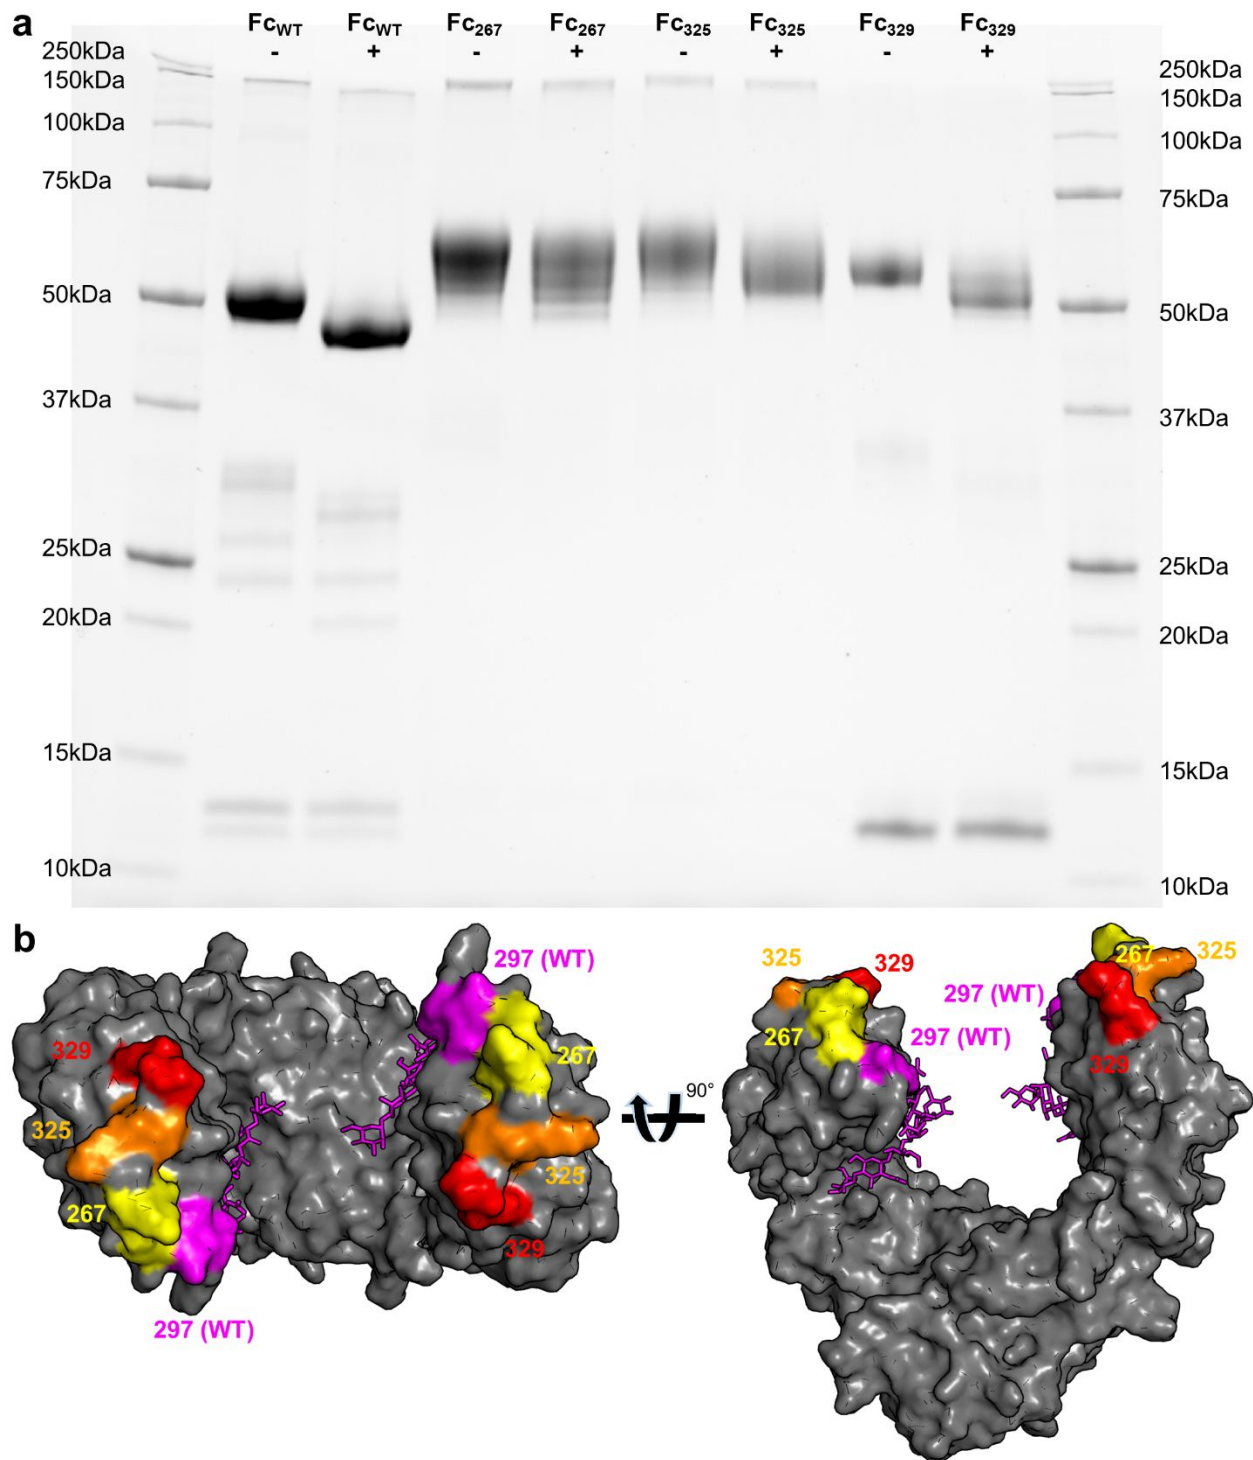

**Figure S8. EndoS2 activity on hyper-glycosylated Fc mutants.** (a) One additional glycosylated site was added to wild-type IgG1 Fc at position 267, 325, or 329, and treated with either PBS (-) or EndoS2<sub>WT</sub> (+) for one week. (b) Glycosylation sites are mapped onto the crystal structure of IgG1 Fc (PDB 5JII)<sup>15</sup> with the wild-type N297 site displayed in magenta, and artificial sites displayed in yellow (N267), orange (N325) and red (N329).

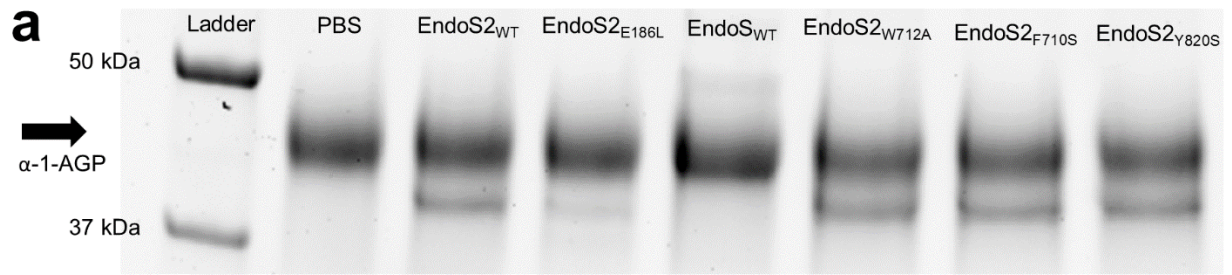

**Figure S9. EndoS2 activity on  $\alpha$ -1-AGP.** (a) 8  $\mu$ g  $\alpha$ -1-AGP was mixed with 4  $\mu$ g enzyme in 20  $\mu$ L PBS for 48 hours at 37°C, and analyzed by SDS-PAGE.

## Supplementary References

- (1) Li, C.; Wen, A.; Shen, B.; Lu, J.; Huang, Y.; Chang, Y. FastCloning: a highly simplified, purification-free, sequence- and ligation-independent PCR cloning method. *BMC Biotechnol* **2011**, *11*, 92.
- (2) Chen, L.; Liu, T.; Zhou, Y.; Chen, Q.; Shen, X.; Yang, Q. Structural characteristics of an insect group I chitinase, an enzyme indispensable to moulting. *Acta Crystallogr D Biol Crystallogr* **2014**, *70* (Pt 4), 932-942.
- (3) Fadel, F.; Zhao, Y.; Cachau, R.; Cousido-Siah, A.; Ruiz, F. X.; Harlos, K.; Howard, E.; Mitschler, A.; Podjarny, A. New insights into the enzymatic mechanism of human chitotriosidase (CHIT1) catalytic domain by atomic resolution X-ray diffraction and hybrid QM/MM. *Acta Crystallogr D Biol Crystallogr* **2015**, *71* (Pt 7), 1455-1470.
- (4) Hsieh, Y. C.; Wu, Y. J.; Chiang, T. Y.; Kuo, C. Y.; Shrestha, K. L.; Chao, C. F.; Huang, Y. C.; Chuankhayan, P.; Wu, W. G.; Li, Y. K. et al. Crystal structures of *Bacillus cereus* NCTU2 chitinase complexes with chitooligomers reveal novel substrate binding for catalysis: a chitinase without chitin binding and insertion domains. *J Biol Chem* **2010**, *285* (41), 31603-31615.
- (5) Itoh, T.; Hibi, T.; Suzuki, F.; Sugimoto, I.; Fujiwara, A.; Inaka, K.; Tanaka, H.; Ohta, K.; Fujii, Y.; Taketo, A. et al. Crystal structure of chitinase ChiW from *Paenibacillus* sp. str. FPU-7 reveals a novel type of bacterial cell-surface-expressed multi-modular enzyme machinery. *PLoS One* **2016**, *11* (12), e0167310.
- (6) Malecki, P. H.; Raczynska, J. E.; Vorgias, C. E.; Rypniewski, W. Structure of a complete four-domain chitinase from *Moritella marina*, a marine psychrophilic bacterium. *Acta Crystallogr D Biol Crystallogr* **2013**, *69* (Pt 5), 821-829.
- (7) Ranok, A.; Wongsantichon, J.; Robinson, R. C.; Suginta, W. Structural and thermodynamic insights into chitooligosaccharide binding to human cartilage chitinase 3-like protein 2 (CHI3L2 or YKL-39). *J Biol Chem* **2015**, *290* (5), 2617-2629.
- (8) Vaaje-Kolstad, G.; Vasella, A.; Peter, M. G.; Netter, C.; Houston, D. R.; Westereng, B.; Synstad, B.; Eijsink, V. G.; van Aalten, D. M. Interactions of a family 18 chitinase with the designed inhibitor HM508 and its degradation product, chitobiono-delta-lactone. *J Biol Chem* **2004**, *279* (5), 3612-3619.
- (9) Davies, G.; Henrissat, B. Structures and mechanisms of glycosyl hydrolases. *Structure* **1995**, *3* (9), 853-859.
- (10) Jitonom, J.; Lee, V. S.; Nimmanpipug, P.; Rowlands, H. A.; Mulholland, A. J. Quantum mechanics/molecular mechanics modeling of substrate-assisted catalysis in family 18 chitinases: conformational changes and the role of Asp142 in catalysis in ChiB. *Biochemistry* **2011**, *50* (21), 4697-4711.
- (11) van Aalten, D. M.; Komander, D.; Synstad, B.; Gaseidnes, S.; Peter, M. G.; Eijsink, V. G. Structural insights into the catalytic mechanism of a family 18 exo-chitinase. *Proc Natl Acad Sci U S A* **2001**, *98* (16), 8979-8984.
- (12) White, A.; Rose, D. R. Mechanism of catalysis by retaining beta-glycosyl hydrolases. *Curr Opin Struct Biol* **1997**, *7* (5), 645-651.
- (13) Williams, S. J.; Mark, B. L.; Vocadlo, D. J.; James, M. N.; Withers, S. G. Aspartate 313 in the *Streptomyces plicatus* hexosaminidase plays a critical role in substrate-assisted catalysis by orienting the 2-acetamido group and stabilizing the transition state. *J Biol Chem* **2002**, *277* (42), 40055-40065.
- (14) Coines, J.; Alfonso-Prieto, M.; Biarnes, X.; Planas, A.; Rovira, C. Oxazoline or oxazolinium ion? The protonation state and conformation of the reaction intermediate of chitinase enzymes revisited. *Chemistry* **2018**, *24* (72), 19258-19265.



- (15) Lobner, E.; Humm, A. S.; Goritzer, K.; Mlynek, G.; Puchinger, M. G.; Hasenhindl, C.; Ruker, F.; Traxlmayr, M. W.; Djinovic-Carugo, K.; Obinger, C. Fcab-HER2 interaction: a menage a trois. Lessons from X-ray and solution studies. *Structure* **2017**, *25* (6), 878-889 e875.
